# Supplementary material for: Functional Redundancy of DICER Cofactors TARBP2 and PRKRA During Murine Embryogenesis Does Not Involve miRNA Biogenesis
Source: PubMed Central journal article supplement (PMC5887145; doi:10.1534/genetics.118.300791), 2018-02-21

**Supplemental\_Fig\_S2, related to Fig. 1.** (A) Summary of genomic/protein locations of the spontaneous *learJ* (little ears, The Jackson Laboratory) *Prkra* allele (*1j*), and an engineered insertion in exon (ex) 8 (*tm1Gsc*). (B) RT-PCR of *Prkra* transcripts in E13.5 organ extracts show significant decreases (\*p-value<0.05) in heart and kidney. (C) Immunoblot for PRKRA shows decreased protein levels in all organs analyzed. (D) MicroCT images of skull showing immature fusion and opening of cranial sutures. RT-PCR in wild-type E13.5 organs total RNA extracts for *Prkra* (M/H Brain, mid/hind brain).

**A**

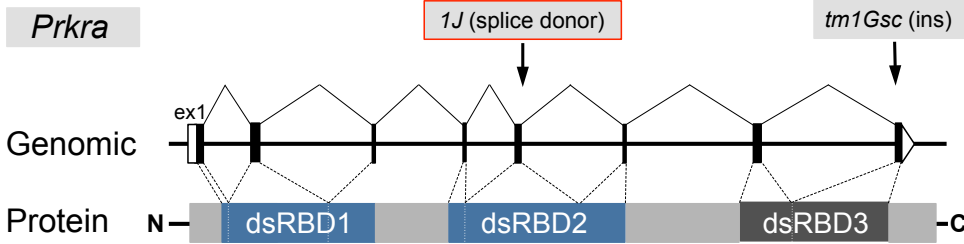

**B**

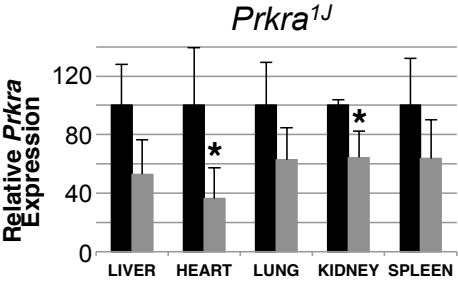

**C**

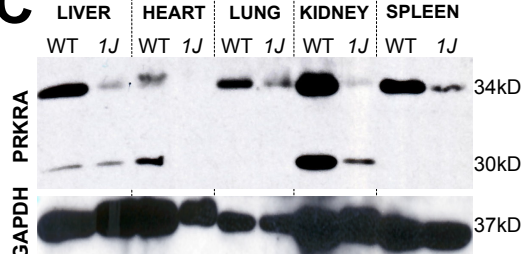

**D**

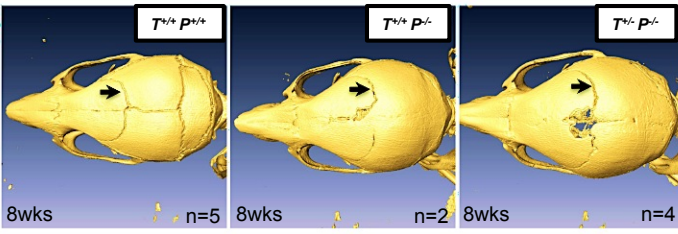

Supplement: 1513FigureS2.pdf [file 1513FigureS2.pdf]
