# Supplementary material for: Functional Redundancy of DICER Cofactors TARBP2 and PRKRA During Murine Embryogenesis Does Not Involve miRNA Biogenesis
Source: PubMed Central journal article supplement (PMC5887145; doi:10.1534/genetics.118.300791), 2018-02-21

**Supplemental\_Fig-S3, related to Fig.4. :** Graphical representation of cell numbers calculated from Day 0 to Day 5 upon Enoxacin and DMSO treatment for each of the indicated genotype. The number of cells is the mean of four different experiments performed in triplicates $\pm$ SD.

Supplemental\_Fig\_S3

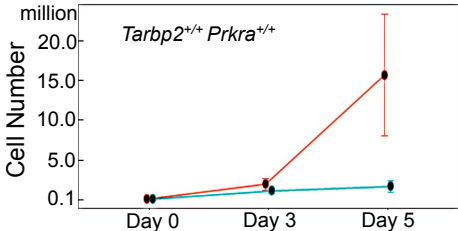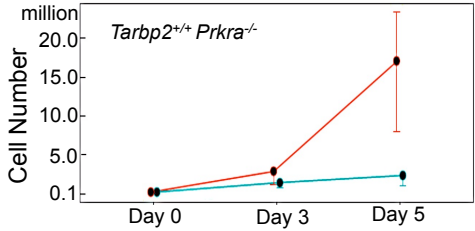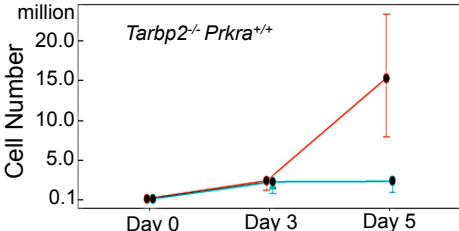

Supplement: 1513FigureS3.pdf [file 1513FigureS3.pdf]
