# Supplementary material for: Functional Redundancy of DICER Cofactors TARBP2 and PRKRA During Murine Embryogenesis Does Not Involve miRNA Biogenesis
Source: PubMed Central journal article supplement (PMC5887145; doi:10.1534/genetics.118.300791), 2018-02-21

**Supplemental\_Fig\_S4:** (A) Schematic representation of genetic crosses made to generate 129S1B6(F1) and 129S1B6(N2) to perform quantitative trait location analysis.

(B) Kaplan-Meier curve showing the percentage survival of *Tarbp2*<sup>-/-</sup> animals with the progression of age on 129B6 mixed background compared to *Tarbp2*<sup>+/-</sup> and *Tarbp2*<sup>+/+</sup>.

(C) R/QTL maps using a binary variable that defined bodyweight and survival.

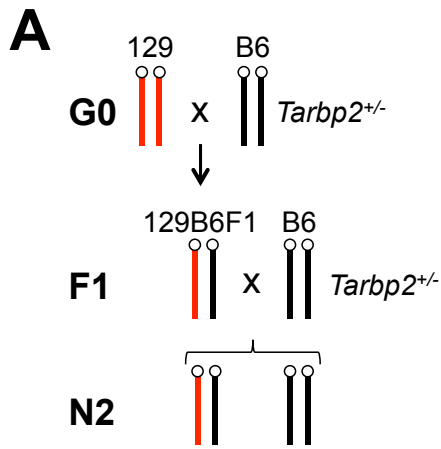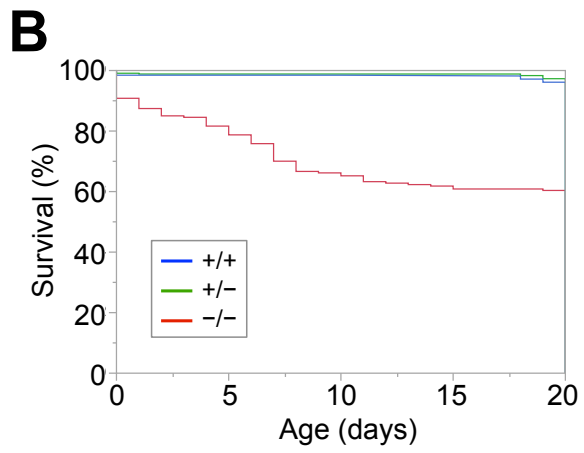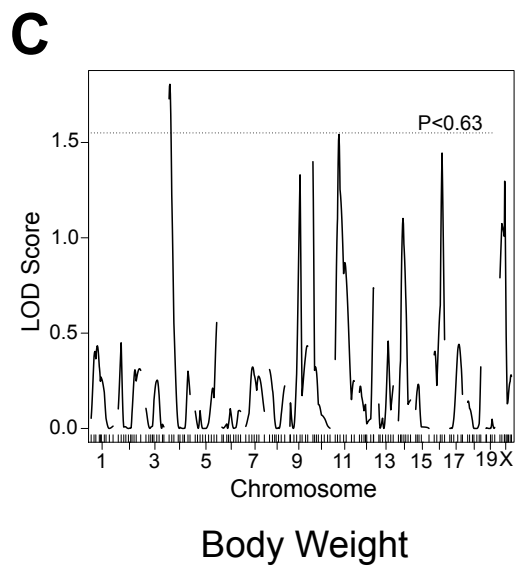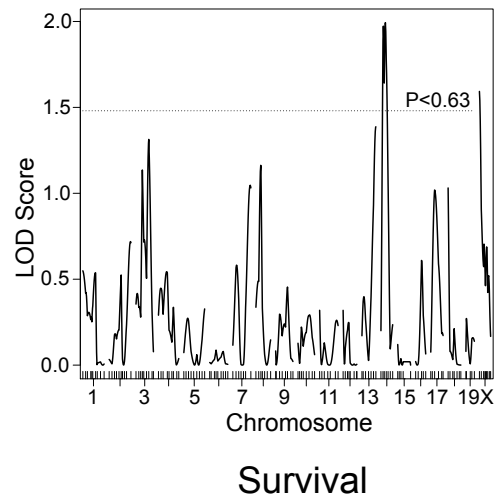

Supplement: 1513FigureS4.pdf [file 1513FigureS4.pdf]
